# Supplementary material for: Constitutively activated PI3K accelerates tumor initiation and modifies histopathology of breast cancer
Source: PubMed Central journal article supplement (PMC5141269; doi:10.1038/oncsis.2016.65), 2016-10-31
Supplement: oncsis201665x1.pdf [file oncsis201665x1.pdf]

## Supplementary Data

**Supplementary Figure 1.** Cre-inducible *Rosa26*-myr-*p110α* knock-in allele with or without Cre-recombinase.

**Supplementary Figure 2.** Expression of myr-*p110α* with deletion of *p53* in mouse embryonic fibroblasts induces transformation *in vitro* and *in vivo*.

**Supplementary Figure 3.** Frequency of mutations in three genes, *PIK3CA*, *p53*, and *Kras*, in human breast cancers.

**Supplementary Figure 4.** Addition of myr-*p110α* elevates the levels of PI3K signaling activation in a copy number-dependent manner.

**Supplementary Figure 5.** Increased gene dosage of myr-*p110α*, when combined with *p53* deletion, modifies tumor subtype to carcinoma.
