# Supplementary material for: Constitutively activated PI3K accelerates tumor initiation and modifies histopathology of breast cancer
Source: PubMed Central journal article supplement (PMC5141269; doi:10.1038/oncsis.2016.65), 2016-10-31
Supplement: oncsis201665x2.pdf [file oncsis201665x2.pdf]

## Supplementary Figure 1

### A. Cells lacking Cre-recombinase.

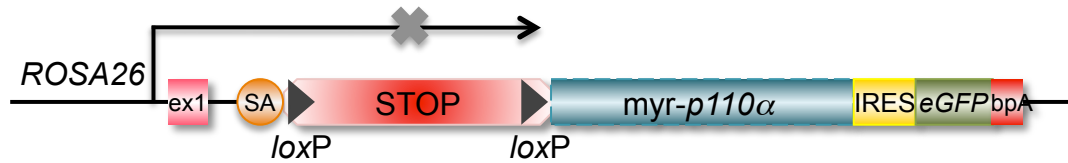

### B. Cells with active Cre-recombinase.

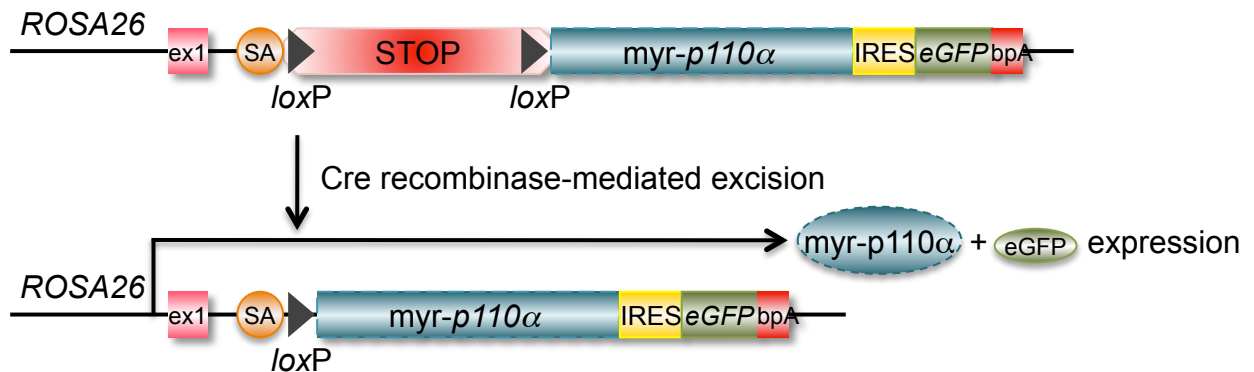

### Supplementary Figure 1. Cre-inducible *Rosa26*-*myr-p110α* knock-in allele with or

**without Cre-recombinase.** Schematic diagrams of the expression construct inserted into

*Rosa26* locus. (A) In cells lacking Cre-recombinase, the STOP cassette blocks expression of

*myr-p110α* from the endogenous *Rosa26* promoter. (B) In cells with active Cre-recombinase,

Cre-mediated removal of the STOP cassette links *Rosa26* exon 1 to *myr-p110α*. As the

endogenous *Rosa26* transcripts are not translated into protein, the first start codon in the

*myr-p110α* is used for initiation of translation, and thus *myr-p110α* is expressed.

Abbreviations: ex1, exon 1; SA, splice acceptor; Myr-*p110α*, myristoylated-*p110α*; IRES,

internal ribosome entry site; eGFP, enhanced green fluorescent protein; bpA, BGH poly A

terminator.
