# Supplementary material for: Constitutively activated PI3K accelerates tumor initiation and modifies histopathology of breast cancer
Source: PubMed Central journal article supplement (PMC5141269; doi:10.1038/oncsis.2016.65), 2016-10-31
Supplement: oncsis201665x3.pdf [file oncsis201665x3.pdf]

## Supplementary Figure 2

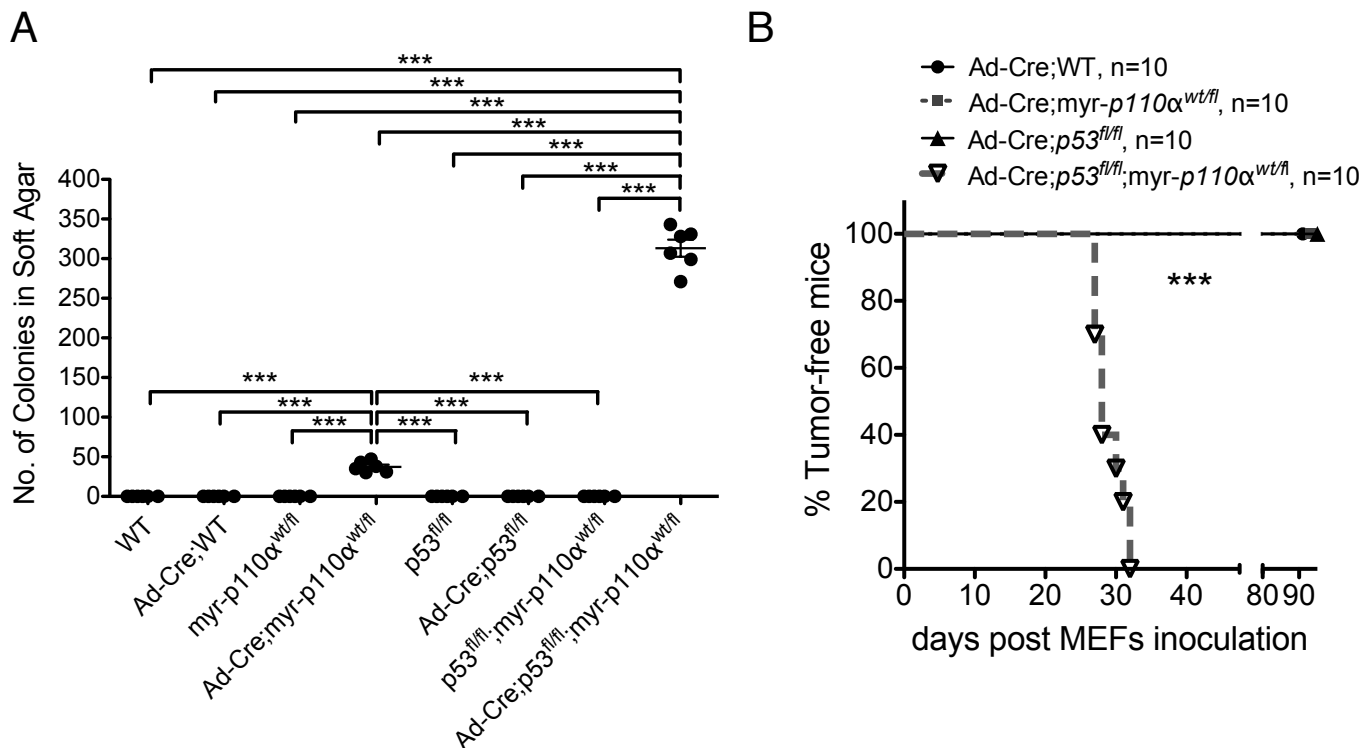

### Supplementary Figure 2. Expression of myr-p110α with deletion of p53 in mouse

**embryonic fibroblasts induces transformation *in vitro* and *in vivo*.** (A) Graph describing the number of colonies in soft agar after 30 days of culture with each pool of stably transfected MEFs at passage number 4-5. Error bars are the mean  $\pm$  SEM. Two-tailed unpaired Student's *t*-test was used for statistical analysis. \*\*\**P* < 0.001. Data are representative of 3 independent experiments using n=6 per group. (B) Kaplan-Meier survival curve demonstrating dermal tumor onset in NSG hosts post intradermal injection of each pool of stably transfected MEFs at passage number 4-5. The date of tumor onset was defined as the first recognition of palpable/visible tumor ranges 10-12 mm<sup>2</sup> size. Log-rank (Mantel-Cox) test was used for statistical analysis. \*\*\**P* < 0.001. Data are representative of 3 independent experiments using n=10 per group.
