# Supplementary material for: Constitutively activated PI3K accelerates tumor initiation and modifies histopathology of breast cancer
Source: PubMed Central journal article supplement (PMC5141269; doi:10.1038/oncsis.2016.65), 2016-10-31
Supplement: oncsis201665x4.pdf [file oncsis201665x4.pdf]

## Supplementary Figure 3

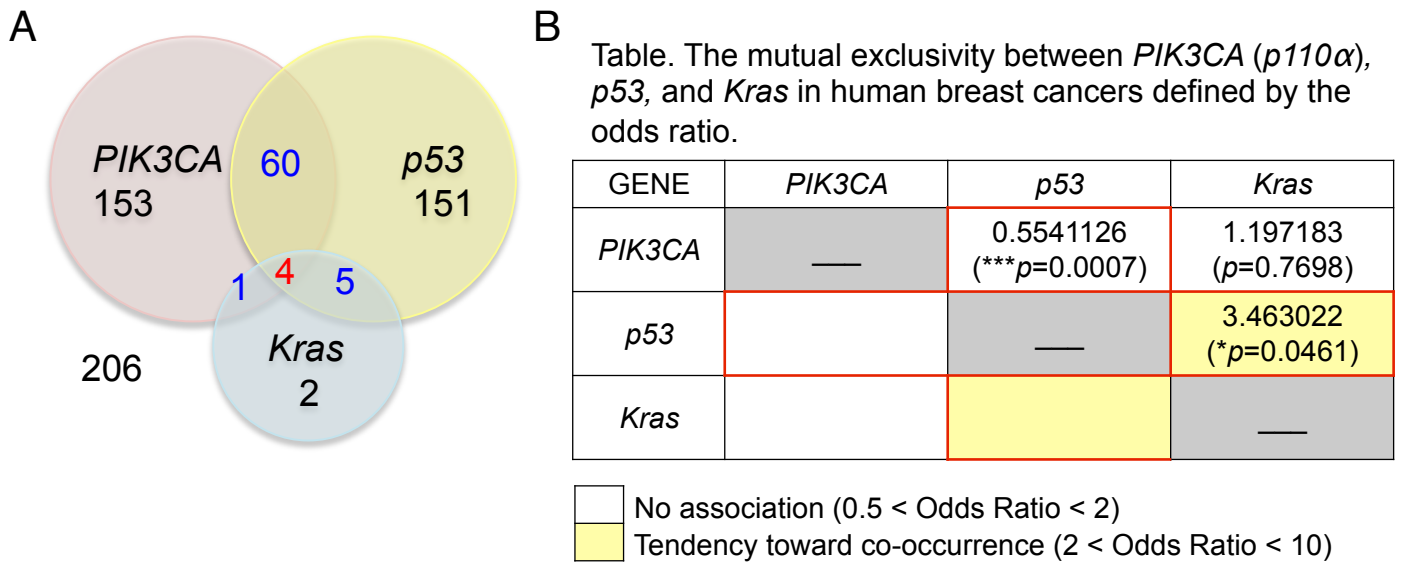

### Supplementary Figure 3. Frequency of mutations in three genes, *PIK3CA*, *p53*, and

***Kras*, in human breast cancers.** (A) Diagram showing number of cases with mutations of three genes, *PIK3CA*, *p53*, and *Kras* in human breast cancers. (B) Table demonstrating mutual exclusivity between *PIK3CA*, *p53*, and *Kras* in human breast cancers. The odds ratio is indicated with *p* value that was derived via Fisher's Exact test. \**P* < 0.05, \*\**P* < 0.01, and \*\*\**P* < 0.001. Data are based on published cancer genomics data collected from 582 breast cancer patients (COSMIC, <http://cancer.sanger.ac.uk/cancergenome/projects/cosmic/>).
