# Supplementary material for: Constitutively activated PI3K accelerates tumor initiation and modifies histopathology of breast cancer
Source: PubMed Central journal article supplement (PMC5141269; doi:10.1038/oncsis.2016.65), 2016-10-31
Supplement: oncsis201665x5.pdf [file oncsis201665x5.pdf]

## Supplementary Figure 4

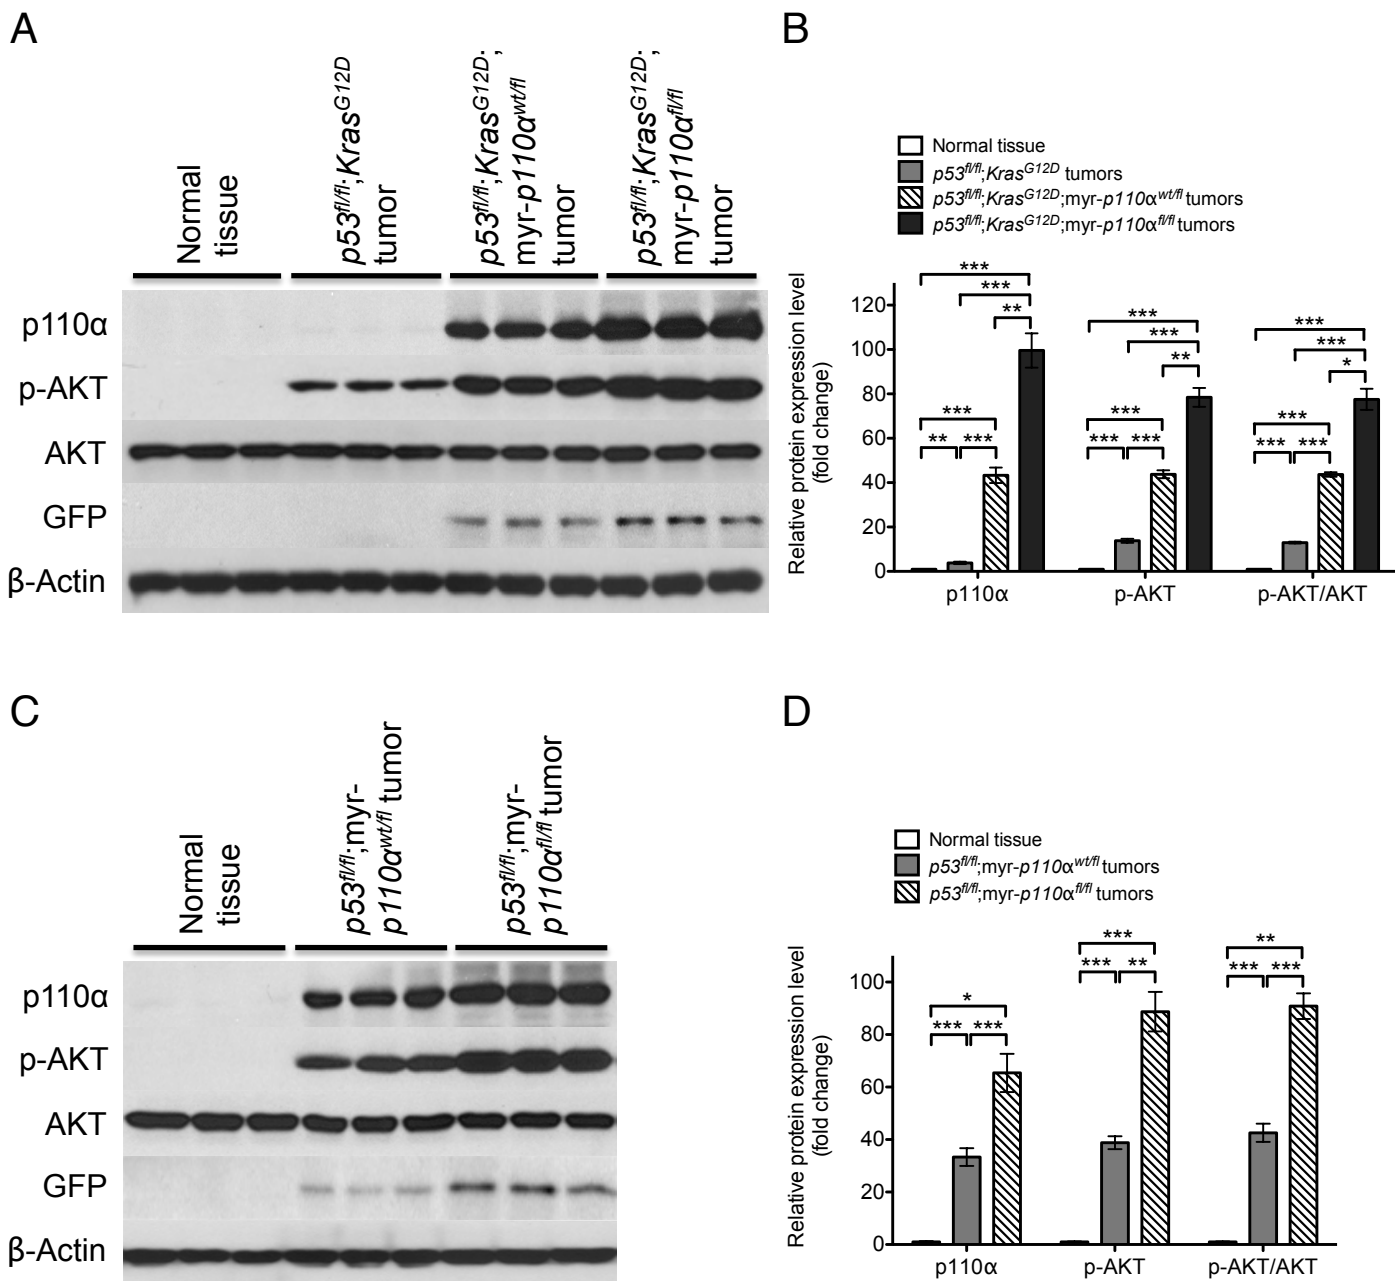

**Supplementary Figure 4. Addition of myr-*p110α* elevates the levels of PI3K signaling activation in a copy number-dependent manner.** (A) Western blot analysis of p110α, p-AKT, AKT, and GFP with normal mammary tissue and mammary tumors from  $p53^{fl/fl};Kras^{G12D}$ ,  $p53^{fl/fl};Kras^{G12D};myr-p110\alpha^{wt/fl}$ , and  $p53^{fl/fl};Kras^{G12D};myr-p110\alpha^{fl/fl}$  mice. (B) The graphs of Western blot signals of p110α, p-AKT, and p-AKT/AKT ratio shown in (A). (C) Western blot

analysis of p110 $\alpha$ , p-AKT, AKT, and GFP with normal mammary tissue and mammary tumors from *p53<sup>fl/fl</sup>;myr-p110 $\alpha$ <sup>wt/fl</sup>* and *p53<sup>fl/fl</sup>;myr-p110 $\alpha$ <sup>fl/fl</sup>* mice. (D) The graphs of Western blot signals of p110 $\alpha$ , p-AKT, and p-AKT/AKT ratio shown in (C). The Western blot signals quantified and normalized with respect to  $\beta$ -Actin protein expression. Mean fold increase compared with normal mammary tissue lysates from a non-Cre harboring age-matched female, was calculated after normalization. Error bars are presented as the mean  $\pm$  SEM. Two-tailed unpaired Student's *t*-test was used for statistical analysis. \**P* < 0.05, \*\**P* < 0.01, and \*\*\**P* < 0.001. Expression of myr-*p110 $\alpha$*  was confirmed by the detection of GFP in mammary tumors. Data are representative of 3 independent experiments with biological and technical replicates.
